# Supplementary material for: The Role of Psychosomatic Traits in Tailored Workup for Anterior Cervical Discectomy and Fusion—A Case Series
Source: MDPI journal article supplement (doi:10.3390/jpm14050454), 2024-04-25
Supplement: s1 [file s1]

**Supplementary Table S1.** Correlation analyses between psychosomatic profiles and preoperative and postoperative pain, disability and quality-of-life parameters.

|                      |         | Somatization | Obsessive-compulsive | Interpersonal sensitivity | Depression | Anxiety | Hostility | Phobic anxiety | Paranoid ideation | Psychoticism |
|----------------------|---------|--------------|----------------------|---------------------------|------------|---------|-----------|----------------|-------------------|--------------|
| <b>Preop-ODI</b>     | Rho     | 0.241        | 0.255                | 0.17                      | 0.289      | 0.237   | 0.203     | 0.201          | 0.123             | 0.111        |
|                      | p-value | 0.05         | 0.037                | 0.169                     | 0.018      | 0.053   | 0.1       | 0.102          | 0.321             | 0.37         |
| <b>FinalFU-ODI</b>   | Rho     | 0.546        | 0.403                | 0.197                     | 0.482      | 0.518   | 0.247     | 0.202          | 0.206             | 0.432        |
|                      | p-value | < .001       | 0.002                | 0.142                     | < .001     | < .001  | 0.063     | 0.131          | 0.124             | < .001       |
| <b>Preop-VAS</b>     | Rho     | 0.326        | 0.31                 | 0.135                     | 0.306      | 0.296   | 0.279     | 0.255          | 0.169             | 0.088        |
|                      | p-value | 0.007        | 0.011                | 0.277                     | 0.012      | 0.015   | 0.022     | 0.038          | 0.173             | 0.479        |
| <b>FinalFU-VAS</b>   | Rho     | 0.446        | 0.269                | 0.054                     | 0.376      | 0.429   | 0.219     | 0.146          | 0.149             | 0.263        |
|                      | p-value | < .001       | 0.047                | 0.696                     | 0.005      | 0.001   | 0.108     | 0.287          | 0.278             | 0.053        |
| <b>Prop-NDI</b>      | Rho     | 0.478        | 0.467                | 0.341                     | 0.519      | 0.453   | 0.383     | 0.355          | 0.341             | 0.247        |
|                      | p-value | < .001       | < .001               | 0.005                     | < .001     | < .001  | 0.001     | 0.003          | 0.005             | 0.044        |
| <b>FinalFU-NDI</b>   | Rho     | 0.62         | 0.461                | 0.179                     | 0.522      | 0.557   | 0.308     | 0.271          | 0.315             | 0.383        |
|                      | p-value | < .001       | < .001               | 0.19                      | < .001     | < .001  | 0.022     | 0.045          | 0.019             | 0.004        |
| <b>Preop-SF-36</b>   | Rho     | -0.44        | -0.383               | -0.228                    | -0.407     | -0.363  | -0.276    | -0.235         | -0.183            | -0.237       |
|                      | p-value | < .001       | 0.001                | 0.063                     | < .001     | 0.003   | 0.024     | 0.055          | 0.138             | 0.053        |
| <b>FinalFU-SF-36</b> | Rho     | -0.595       | -0.412               | -0.196                    | -0.476     | -0.461  | -0.292    | -0.235         | -0.209            | -0.328       |
|                      | p-value | < .001       | 0.001                | 0.144                     | < .001     | < .001  | 0.028     | 0.078          | 0.118             | 0.013        |
| <b>Preop-EQ-5D</b>   | Rho     | -0.33        | -0.332               | -0.326                    | -0.401     | -0.357  | -0.321    | -0.379         | -0.308            | -0.272       |
|                      | p-value | 0.006        | 0.006                | 0.007                     | < .001     | 0.003   | 0.008     | 0.002          | 0.011             | 0.026        |
| <b>FinalFU-EQ-5D</b> | Rho     | -0.47        | -0.391               | -0.149                    | -0.37      | -0.43   | -0.216    | -0.141         | -0.222            | -0.304       |
|                      | p-value | < .001       | 0.003                | 0.274                     | 0.005      | < .001  | 0.11      | 0.298          | 0.101             | 0.023        |
